# Supplementary material
Source: HighWire-hosted journal article supplement (https://ez-admanager.com/highwire/filestream/161073/field_highwire_adjunct_files/0/zhang_426.pdf)
Supplement: zhang_426.pdf [file zhang_426.pdf]

## 脳小血管病患者では血液脳関門の漏出がより広範囲にみられる

Blood-brain barrier leakage is more widespread in patients with cerebral small vessel disease

C. Eleana Zhang,

MD\*,\*\*,\*\*\*;

Sau May Wong, MSc\*\*\*;

Harm J. van de Haar, MSc\*\*\*;

Julie Staals, MD, PhD\*,\*\*\*;

Jacobus F.A. Jansen, PhD\*\*\*;

Cécile R.L.P.N. Jeukens,

PhD;

Paul A.M. Hofman, MD\*\*\*;

Robert J. van Oostenbrugge,

MD, PhD\*,\*\*,\*\*\*;

Walter H. Backes, PhD\*\*\*

\*Departments of  
Neurology, Maastricht  
University Medical  
Centre

\*\*Cardiovascular Research  
Institute Maastricht  
(CARIM)

\*\*\*School for Mental  
Health and Neuroscience  
(MHeNS), Maastricht,  
the Netherlands

Correspondence to  
Dr. Zhang:  
cleana.zhang@mumc.nl

**目的：**血液脳関門 (BBB) の機能障害は正常な老化でも起こりうるが、脳小血管病 (cSVD) の病態生理においても重大な関連があると考えられる。本研究では、cSVDに関連した BBBの漏出と老化に関連した漏出とを識別するため、ダイナミック造影MRI (DCE-MRI) を用い、cSVD患者と年齢および性別をマッチさせた対照被験者において、BBBの漏出の速度と空間的な広がりを定量した。

**方法：**臨床的に明らかなcSVDのある患者80例と年齢および性別をマッチさせた対照被験者40例において、脳の構造MRIとDCE-MRIを実施した。Patlakの薬物動態モデルを用いて漏出速度を算出した。平均漏出速度と相対漏出体積はノイズ補正ヒストグラム解析で算出した。正常にみえる白質 (normal-appearing white matter ; NAWM), 白質高信号域 (WMH), 皮質灰白質 (CGM), 深部灰白質において、漏出速度と漏出体積をcSVD患者と対照被験者との間で比較した。

**結果：**年齢、性別、心血管危険因子で補正した多変量線形回帰分析において、NAWM, WMH, CGMにおける漏出体積は、対照被験者に比べてcSVD患者で有意に大きかった。いずれの組織領域でも漏出速度に有意差はみられなかった。

**結論：**本研究の結果、cSVD患者では、BBBの漏出はわずかであるが、漏出の起こっている組織体積は対照被験者よりも大きいことが示された。この所見はNAWM, WMH, CGMでみられ、cSVDの一般的な性質であることが支持された。

Neurology® 2017; 88: 426-432

図2 fluid-attenuated inversion recovery (FLAIR) 画像と漏出マップ

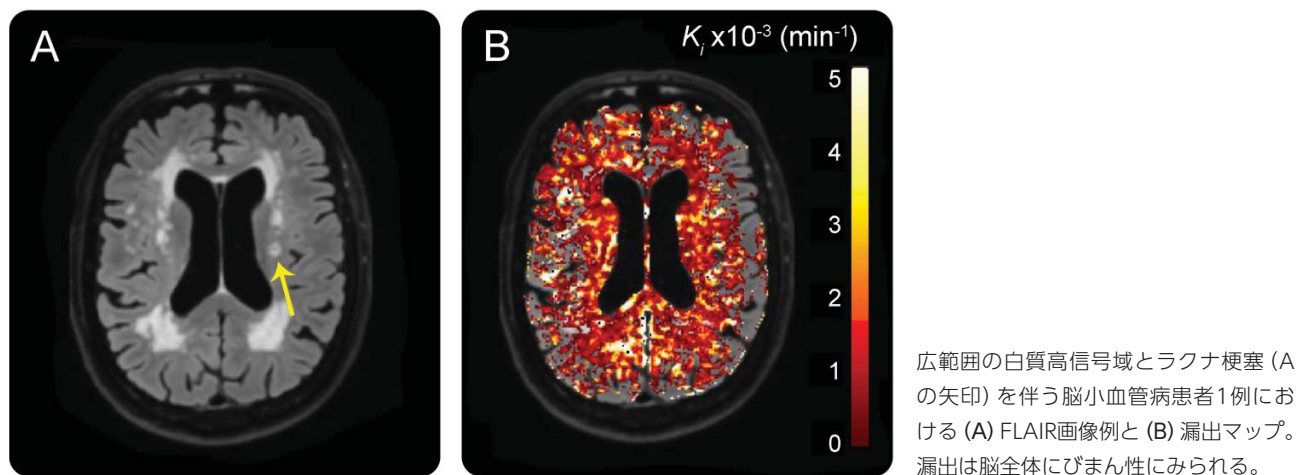

表2 脳小血管病 (cSVD) 患者と対照被験者の漏出速度, 漏出体積, 血漿体積

|                                      | Patients with cSVD | Controls    | Univariable |                     | Multivariable |                      |
|--------------------------------------|--------------------|-------------|-------------|---------------------|---------------|----------------------|
|                                      |                    |             | $\beta$     | p Value             | $\beta$       | p Value              |
| <b>NAWM</b>                          |                    |             |             |                     |               |                      |
| $K_i$ ( $10^{-3} \text{ min}^{-1}$ ) | 0.97 (0.04)        | 1.05 (0.05) | -0.119      | 0.20                | -1.960        | 0.05                 |
| $v_L$ ( $10^{-2}$ )                  | 37.4 (2.15)        | 31.4 (2.91) | 0.151       | 0.11                | 0.261         | 0.01 <sup>a,b</sup>  |
| $v_p$ ( $10^{-2}$ )                  | 1.68 (0.10)        | 2.30 (0.45) | -0.163      | 0.08                | -0.156        | 0.13                 |
| <b>WMH</b>                           |                    |             |             |                     |               |                      |
| $K_i$ ( $10^{-3} \text{ min}^{-1}$ ) | 0.85 (0.03)        | 0.87 (0.05) | -0.042      | 0.66                | -0.086        | 0.41                 |
| $v_L$ ( $10^{-2}$ )                  | 45.5 (2.31)        | 35.2 (3.00) | 0.239       | 0.01 <sup>a,b</sup> | 0.329         | 0.001 <sup>a,b</sup> |
| $v_p$ ( $10^{-2}$ )                  | 1.61 (0.14)        | 2.27 (0.34) | -0.199      | 0.03 <sup>b</sup>   | -0.184        | 0.07                 |
| <b>CGM</b>                           |                    |             |             |                     |               |                      |
| $K_i$ ( $10^{-3} \text{ min}^{-1}$ ) | 1.43 (0.05)        | 1.49 (0.07) | -0.071      | 0.45                | -0.140        | 0.17                 |
| $v_L$ ( $10^{-2}$ )                  | 20.7 (1.56)        | 14.7 (1.76) | 0.214       | 0.02 <sup>a,b</sup> | 0.313         | 0.002 <sup>a,b</sup> |
| $v_p$ ( $10^{-2}$ )                  | 3.56 (0.19)        | 4.39 (0.53) | -0.165      | 0.08                | -0.162        | 0.12                 |
| <b>DGM</b>                           |                    |             |             |                     |               |                      |
| $K_i$ ( $10^{-3} \text{ min}^{-1}$ ) | 1.06 (0.04)        | 1.11 (0.06) | -0.070      | 0.45                | -0.110        | 0.29                 |
| $v_L$ ( $10^{-2}$ )                  | 33.3 (2.14)        | 30.4 (3.61) | 0.068       | 0.47                | 1.77          | 0.08                 |
| $v_p$ ( $10^{-2}$ )                  | 3.33 (0.20)        | 4.09 (0.57) | -0.142      | 0.13                | -0.121        | 0.25                 |

略語：CGM=皮質灰白質, DGM=深部灰白質,  $K_i$ =漏出速度, NAWM=正常にみえる白質,  $v_L$ =漏出体積,  $v_p$ =血漿体積, WMH=白質高信号域

値は平均 (標準誤差)。多変量線形回帰分析では $K_i$ ,  $v_L$ ,  $v_p$ を従属変数, 年齢, 性別, 群, 心血管危険因子を独立変数とした。

<sup>a</sup>有意差あり。

<sup>b</sup>検討対象の4組織領域の検定に伴う多重比較を補正後, なお統計学的に有意であったp値。
